# Supplementary material for: Ultrathin, flexible and sandwich-structured PHBV/silver nanowire films for high-efficiency electromagnetic interference shielding
Source: Royal Society of Chemistry journal article supplement (doi:10.1039/d0tc05266c), 2021-01-01
Supplement: d0tc05266c1.pdf [file d0tc05266c1.pdf]

## Supplementary Information

### Ultrathin, Flexible and Sandwich-Structured PHBV/Silver Nanowire Films for High-Efficiency Electromagnetic Interference Shielding

Song Yang<sup>a</sup>, Yue-Yi Wang<sup>a</sup>, Ying-Nan Song<sup>a</sup>, Li-Chuan Jia<sup>b</sup>, Gan-Ji Zhong<sup>a</sup>, Ling Xu<sup>a</sup>,  
Ding-Xiang Yan<sup>a,c</sup>, Jun Lei<sup>a\*</sup>, Zhong-Ming Li<sup>a\*</sup>

<sup>a</sup> College of Polymer Science and Engineering, State Key Laboratory of Polymer  
Materials Engineering, Sichuan University, Chengdu 610065, China

<sup>b</sup> College of Electrical Engineering, Sichuan University, Chengdu 610065, China

<sup>c</sup> School of Aeronautics and Astronautics, Sichuan University, Chengdu 610065, China

\*Corresponding Authors: leijun@scu.edu.cn (Lei, J) and zmli@scu.edu.cn (Li, Z. M.)

Table S1. EMI shielding performance of various shielding materials

| Materials | Matrix    | Density<br>(g/cm <sup>3</sup> ) | Thickness<br>(mm) | EMI SE<br>(dB) | SSE<br>(dB/cm) | SSE/t<br>(dB* cm <sup>2</sup> /g) | Ref.         |
|-----------|-----------|---------------------------------|-------------------|----------------|----------------|-----------------------------------|--------------|
| Graphene  | PMMA      | 1.19                            | 3.4               | 30             | 74.1           | 88.2                              | 1            |
|           | -         | 1.07                            | 0.05              | 60             | 11214.9        | 12000                             | 2            |
|           | -         | 0.41                            | 0.12              | 70             | 14227.6        | 5833                              | 3            |
|           | -         | 0.06                            | 0.3               | 25             | 13888.8        | 833.3                             | 4            |
|           | PEDOT:PSS | 0.022                           | 1.5               | 65             | 19696.9        | 433.3                             | 5            |
| rGO       | epoxy     | 1.07                            | 0.1               | 38             | 3551.4         | 3800                              | 6            |
|           | PS        | 0.26                            | 2.5               | 45             | 692.3          | 180                               | 7            |
|           | PDMS      | 0.06                            | 1                 | 30             | 5000           | 300                               | 8            |
|           | PEI       | 0.29                            | 2.3               | 10             | 149.9          | 43.4                              | 9            |
|           | PMMA      | 0.79                            | 4                 | 19             | 60.1           | 47.5                              | 10           |
| CNT       | -         | 0.02                            | 2.4               | 22             | 4583.3         | 91.6                              | 11           |
|           | WPU       | 0.04                            | 1                 | 21             | 5250           | 210                               | 12           |
|           | PS        | 0.56                            | 1.2               | 18.5           | 275.2          | 154.1                             | 13           |
|           | -         | 0.6                             | 0.26              | 56             | 3589.7         | 2153.8                            | 14           |
|           | Cellulose | 1.7                             | 0.15              | 35             | 1372.5         | 2333.3                            | 15           |
| MXene     | CNF       | 2.09                            | 0.047             | 26             | 2646.8         | 5531.9                            | 16           |
|           | CNF       | 1.26                            | 0.038             | 37.7           | 7873.8         | 9921.0                            | 17           |
|           | PVA       | 0.011                           | 5                 | 28             | 5090.9         | 56                                | 18           |
|           | CNF       | 1.63                            | 0.035             | 40             | 7011.3         | 11428.5                           | 19           |
|           | PS        | 1.08                            | 2                 | 62             | 287.0          | 310                               | 20           |
| AgNW      | PI        | 0.029                           | 5                 | 35             | 2413.7         | 70                                | 21           |
|           | Cellulose | 0.53                            | 0.16              | 48.6           | 5731.1         | 3037.5                            | 22           |
| AgNW      | PHBV      | 1.254                           | 0.016             | 14.0           | 8750           | 6999.5                            | This<br>work |
|           | PHBV      | 1.257                           | 0.016             | 20.1           | 12562.5        | 10031.8                           |              |
|           | PHBV      | 1.26                            | 0.017             | 32.2           | 18941.18       | 15036.2                           |              |
|           | PHBV      | 1.28                            | 0.016             | 41.1           | 25687.5        | 19678.4                           |              |
|           | PHBV      | 1.31                            | 0.018             | 45.9           | 25500          | 19465.4                           |              |

Table S2. EMI shielding performance of various shielding materials at different contents

| Materials | Matrix | Filler<br>[wt %] | EMI SE<br>(dB) | SSE/t<br>(dB* cm <sup>2</sup> /g) | Ref.         |
|-----------|--------|------------------|----------------|-----------------------------------|--------------|
| Graphene  | PMMA   | 5                | 19             | 100                               | 10           |
|           | PS     | 30               | 29             | 257                               | 23           |
|           | PI     | 16               | 20.8           | 929                               | 24           |
|           | PDMS   | 10               | 11             | 42                                | 25           |
|           | PI     | 8                | 14.9           | 693                               | 26           |
|           | PI     | 13               | 28.8           | 1518                              | 27           |
| rGO       | PEI    | 10               | 22             | 191                               | 9            |
|           | PS     | 30               | 29             | 257                               | 23           |
|           | PI     | 16               | 21             | 11712                             | 24           |
|           | PS     | 7                | 45             | 692                               | 7            |
|           | PEDOT  | 25               | 70             | 841                               | 28           |
| CNT       | WPU    | 76.2             | 21             | 5431                              | 12           |
|           | PS     | 7                | 18.5           | 275                               | 13           |
|           | PC     | 20               | 39             | 164                               | 29           |
|           | ABS    | 15               | 50             | 432.7                             | 30           |
|           | PS     | 20               | 30             | 285                               | 31           |
| MXene     | -      | 100              | 92             | 25863                             | 32           |
|           | PVA    | 7.5              | 26.9           | 6919                              | 33           |
|           | PVA    | 13.9             | 37.1           | 8833                              | 33           |
|           | PVA    | 19.5             | 44.4           | 9343                              | 33           |
|           | ANF    | 10               | 35.5           | 7595                              | 34           |
|           | ANF    | 40               | 57.3           | 9317                              | 34           |
|           | MMT    | 90               | 67             | 10156                             | 35           |
|           | MMT    | 95               | 64.5           | 9482                              | 35           |
| AgNW      | PI     | 4.5              | 30             | 2416                              | 21           |
| AgNW      | PHBV   | 0.33             | 14.0           | 6999.5                            | This<br>work |
|           | PHBV   | 0.67             | 20.1           | 10031.8                           |              |
|           | PHBV   | 1.33             | 32.2           | 15036.2                           |              |
|           | PHBV   | 2.67             | 41.1           | 19678.4                           |              |
|           | PHBV   | 5.33             | 45.9           | 19465.4                           |              |

## References

1. H. B. Zhang, W. G. Zheng, Q. Yan, Z. G. Jiang and Z. Z. Yu, *Carbon*, 2012, **50**, 5117-5125.
2. L. Zhang, N. T. Alvarez, M. Zhang, M. Haase, R. Malik, D. Mast and V. Shanov, *Carbon*, 2015, **82**, 353-359.
3. J. B. Xi, Y. L. Li, E. Z. Zhou, Y. J. Liu, W. W. Gao, Y. Guo, J. Ying, Z. C. Chen, G. G. Chen and C. Gao, *Carbon*, 2018, **135**, 44-51.
4. B. Shen, Y. Li, D. Yi, W. Zhai, X. Wei and W. Zheng, *Carbon*, 2016, **102**, 154-160.
5. Y. Wu, Z. Y. Wang, X. Liu, X. Shen, Q. B. Zheng, Q. Xue and J. K. Kim, *ACS Appl. Mater. Interfaces.*, 2017, **9**, 9059-9069.
6. N. Yousefi, X. Y. Sun, X. Y. Lin, X. Shen, J. J. Jia, B. Zhang, B. Z. Tang, M. S. Chan and J. K. Kim, *Adv. Mater.*, 2014, **26**, 5480-5487.
7. D. X. Yan, H. Pang, B. Li, R. Vajtai, L. Xu, P. G. Ren, J. H. Wang and Z. M. Li, *Adv. Funct. Mater.*, 2015, **25**, 559-566.
8. Z. Chen, C. Xu, C. Ma, W. Ren and H.-M. Cheng, *Adv. Mater.*, 2013, **25**, 1296-1300.
9. J. Q. Ling, W. T. Zhai, W. W. Feng, B. Shen, J. F. Zhang and W. G. Zheng, *ACS Appl. Mater. Interfaces.*, 2013, **5**, 2677-2684.
10. H. B. Zhang, Q. Yan, W. G. Zheng, Z. X. He and Z. Z. Yu, *ACS Appl. Mater. Interfaces.*, 2011, **3**, 918-924.
11. M. Crespo, M. Gonzalez, A. L. Elias, L. P. Rajukumar, J. Baselga, M. Terrones and J. Pozuelo, *Physica Status Solidi-Rapid Research Letters*, 2014, **8**, 698-704.
12. Z. H. Zeng, H. Jin, M. J. Chen, W. W. Li, L. C. Zhou and Z. Zhang, *Adv. Funct. Mater.*, 2016, **26**, 303-310.
13. Y. L. Yang and M. C. Gupta, *Nano Lett.*, 2005, **5**, 2131-2134.
14. A. Chaudhary, S. Kumari, R. Kumar, S. Teotia, B. P. Singh, A. P. Singh, S. K. Dhawan and S. R. Dhakate, *ACS Appl. Mater. Interfaces.*, 2016, **8**, 10600-10608.
15. L. Q. Zhang, B. Yang, J. Teng, J. Lei, D. X. Yan, G. J. Zhong and Z. M. Li, *J. Mater. Chem. C*, 2017, **5**, 3130-3138.
16. W. T. Cao, F. F. Chen, Y. J. Zhu, Y. G. Zhang, Y. Y. Jiang, M. G. Ma and F. Chen, *ACS Nano*, 2018, **12**, 4583-4593.
17. W. T. Cao, C. Ma, S. Tan, M. G. Ma, P. B. Wan and F. Chen, *Nano-Micro Letters*, 2019, **11**.
18. H. L. Xu, X. W. Yin, X. L. Li, M. H. Li, S. Liang, L. T. Zhang and L. F. Cheng, *ACS Appl. Mater. Interfaces.*, 2019, **11**, 10198-10207.
19. B. Zhou, Z. Zhang, Y. L. Li, G. J. Han, Y. Z. Feng, B. Wang, D. B. Zhang, J. M. Ma and C. T. Liu, *ACS Appl. Mater. Interfaces.*, 2020, **12**, 4895-4905.
20. R. H. Sun, H. B. Zhang, J. Liu, X. Xie, R. Yang, Y. Li, S. Hong and Z. Z. Yu, *Adv. Funct. Mater.*, 2017, **27**.
21. J. Ma, K. Wang and M. Zhan, *RSC Adv.*, 2015, **5**, 65283-65296.
22. T. W. Lee, S. E. Lee and Y. G. Jeong, *ACS Appl. Mater. Interfaces.*, 2016, **8**, 13123-13132.
23. D. X. Yan, P. G. Ren, H. Pang, Q. Fu, M. B. Yang and Z. M. Li, *J. Mater. Chem.*, 2012, **22**, 18772-18774.
24. Y. Li, X. L. Pei, B. Shen, W. T. Zhai, L. H. Zhang and W. G. Zheng, *RSC Adv.*, 2015, **5**, 24342-24351.
25. L. Kong, X. W. Yin, X. Y. Yuan, Y. J. Zhang, X. M. Liu, L. F. Cheng and L. T. Zhang, *Carbon*,

- 2014, **73**, 185-193.
26. H. L. Yang, Z. L. Li, H. W. Zou and P. B. Liu, *Polym. Adv. Technol.*, 2017, **28**, 233-242.
27. Z. Yu, T. W. Dai, S. Yuan, H. W. Zou and P. B. Liu, *ACS Appl. Mater. Interfaces.*, 2020, **12**, 30990-31001.
28. N. Agnihotri, K. Chakrabarti and A. De, *RSC Adv.*, 2015, **5**, 43765-43771.
29. S. Pande, A. Chaudhary, D. Patel, B. P. Singh and R. B. Mathur, *RSC Adv.*, 2014, **4**, 13839-13849.
30. M. H. Al-Saleh, W. H. Saadeh and U. Sundararaj, *Carbon*, 2013, **60**, 146-156.
31. M. Arjmand, T. Apperley, M. Okoniewski and U. Sundararaj, *Carbon*, 2012, **50**, 5126-5134.
32. F. Shahzad, M. Alhabeab, C. B. Hatter, B. Anasori, S. M. Hong, C. M. Koo and Y. Gogotsi, *Science*, 2016, **353**, 1137-1140.
33. X. X. Jin, J. F. Wang, L. Z. Dai, X. Y. Liu, L. Li, Y. Y. Yang, Y. X. Cao, W. J. Wang, H. Wu and S. Y. Guo, *Chem. Eng. J.*, 2020, **380**, 122475.
34. Z. L. Ma, S. L. Kang, J. Z. Ma, L. Shao, Y. L. Zhang, C. Liu, A. J. Wei, X. L. Xiang, L. F. Wei and J. W. Gu, *ACS Nano*, 2020, **14**, 8368-8382.
35. L. Li, Y. X. Cao, X. Y. Liu, J. F. Wang, Y. Y. Yang and W. J. Wang, *ACS Appl. Mater. Interfaces.*, 2020, **12**, 27350-27360.
